# Supplementary material for: Exploring Anatomo-Morphometric Characteristics of Infrapatellar, Suprapatellar Fat Pad, and Knee Ligaments in Osteoarthritis Compared to Post-Traumatic Lesions
Source: MDPI journal article supplement (doi:10.3390/biomedicines10061369), 2022-06-09
Supplement: s1 [file s1]

## Supplementary file

**Table S1.** ACL and PCL MR morphometric characteristics in patients with meniscal tear, ACLR and end-stage OA.

|                                | Meniscal tear        | ACLR                 | End-stage OA         | P       |
|--------------------------------|----------------------|----------------------|----------------------|---------|
| ACL volume (mm <sup>3</sup> )  | 413.0 (511.7-338.1)  |                      | 453.7 (655.7-264.3)  | p=0.865 |
| ACL surface (mm <sup>2</sup> ) | 529.8 (631.7-469.4)  |                      | 551.1 (695.5-408.0)  | p=0.830 |
| ACL length (mm)                | 34.4 (39.0-32.6)     |                      | 33.8 (37.4-29.9))    | p=0.296 |
| PCL volume (mm <sup>3</sup> )  | 928.2 (1285.1-775.4) | 924.2 (1144.1-757.7) | 973.1 (1041.7-782.2) | p=0.860 |
| PCL surface (mm <sup>2</sup> ) | 848.5 (988.9-713.1)  | 823.1 (954.9-745.6)  | 838.4 (906.0-763.3)  | p=0.856 |
| PCL length (mm)                | 39.3 (43.4-35.7)     | 41.5 (45.2-38.5)     | 39.1 (43.9-36.3)     | p=0.117 |

ACL = anterior cruciate ligament, PCL = posterior cruciate ligament, MR = magnetic resonance; ACLR = anterior cruciate ligament rupture; OA = osteoarthritis.

Data are expressed as median (Interquartile range).

**Table S2.** Multivariate analysis of IFP volume.

|           | Estimate  | Standard error | t-value | p-value  |
|-----------|-----------|----------------|---------|----------|
| Intercept | 25745.25  | 4273.17        | 6.025   | p<0.001  |
| Age       | 30.03     | 53.91          | 0.557   | p=0.5790 |
| Sex       | -10366.45 | 1272.36        | -8.147  | p<0.001  |
| BMI       | 242.10    | 129.95         | 1.863   | p=0.0660 |
| ACL       | 4002.23   | 1520.55        | 2.632   | p=0.0101 |
| OA        | -4452.37  | 1854.01        | -2.401  | p=0.0186 |

IFP = infrapatellar fat pad; BMI = body mass index; ACL = anterior cruciate ligament; OA = Osteoarthritis.

**Table S3. Multivariate analysis of IFP surface.**

|                  | <b>Estimate</b> | <b>Standard error</b> | <b>t-value</b> | <b>p-value</b> |
|------------------|-----------------|-----------------------|----------------|----------------|
| <b>Intercept</b> | 6118.64         | 886.72                | 6.90           | p<0.0001       |
| <b>Age</b>       | 6.73            | 11.19                 | 0.60           | p=0.549        |
| <b>Sex</b>       | -1869.96        | 264.03                | -7.08          | p<0.0001       |
| <b>BMI</b>       | 60.17           | 26.97                 | 2.23           | p=0.028        |
| <b>ACL</b>       | 1028.56         | 315.60                | 3.26           | p=0.002        |
| <b>OA</b>        | -783.40         | 384.73                | -2.04          | p=0.045        |

IFP = infrapatellar fat pad; BMI = body mass index; ACL = anterior cruciate ligament; OA = Osteoarthritis.

**Table S4. Multivariate analysis of IFP depth\*.**

|                  | <b>Estimate</b> | <b>Standard error</b> | <b>t-value</b> | <b>p-value</b> |
|------------------|-----------------|-----------------------|----------------|----------------|
| <b>Intercept</b> | 903.01          | 205.45                | 4.39           | p<0.001        |
| <b>Age</b>       | 2.13            | 2.59                  | 0.82           | p=0.413        |
| <b>Sex</b>       | -298.13         | 61.33                 | -4.86          | p<0.001        |
| <b>BMI</b>       | 0.72            | 6.20                  | 0.12           | p=0.910        |
| <b>ACL</b>       | 88.62           | 74.72                 | 1.19           | p=0.239        |
| <b>OA</b>        | -266.51         | 88.71                 | -3.00          | p=0.004        |

IFP = infrapatellar fat pad; BMI = body mass index; ACL = anterior cruciate ligament; OA = Osteoarthritis.

\*the variable did not follow a normal distribution, thus the square of variable was analyzed.

**Table S5. Multivariate analysis of IFP Femoral arch length.**

|                  | Estimate | Standard error | t-value | p-value  |
|------------------|----------|----------------|---------|----------|
| <b>Intercept</b> | 903.01   | 4.76           | 6.42    | p<0.0001 |
| <b>Age</b>       | 0.09     | 0.06           | 1.47    | p=0.145  |
| <b>Sex</b>       | -5.75    | 1.42           | -4.04   | p<0.0001 |
| <b>BMI</b>       | -0.09    | 0.14           | -0.62   | p=0.540  |
| <b>ACL</b>       | 1.29     | 1.73           | 0.75    | p=0.457  |
| <b>OA</b>        | -3.93    | 2.06           | -1.91   | p=0.059  |

IFP = infrapatellar fat pad; BMI = body mass index; ACL = anterior cruciate ligament; OA = Osteoarthritis.

**Table S6. Multivariate analysis of IFP tibial arch length\*.**

|                  | Estimate | Standard error | t-value | p-value  |
|------------------|----------|----------------|---------|----------|
| <b>Intercept</b> | 1103.05  | 248.34         | 4.44    | p<0.0001 |
| <b>Age</b>       | 3.90     | 3.13           | 1.24    | p=0.217  |
| <b>Sex</b>       | -270.23  | 74.14          | -3.64   | p<0.001  |
| <b>BMI</b>       | -3.72    | 7.49           | -0.50   | p=0.621  |
| <b>ACL</b>       | -86.50   | 90.32          | -0.96   | p=0.341  |
| <b>OA</b>        | -366.70  | 107.22         | -3.42   | p<0.001  |

IFP = infrapatellar fat pad; BMI = body mass index; ACL = anterior cruciate ligament; OA = Osteoarthritis.

\*the variable did not follow a normal distribution, thus the square of the variable was analyzed.

**Table S7. Multivariate analysis of SFP volume\*.**

|                  | <b>Estimate</b> | <b>Standard error</b> | <b>t-value</b> | <b>p-value</b> |
|------------------|-----------------|-----------------------|----------------|----------------|
| <b>Intercept</b> | 6.24            | 0.34                  | 18.28          | p<0.0001       |
| <b>Age</b>       | 0.005           | 0.005                 | 1.18           | p=0.243        |
| <b>Sex</b>       | -0.22           | 0.10                  | -2.28          | p=0.025        |
| <b>BMI</b>       | 0.02            | 0.01                  | 2.28           | p=0.025        |
| <b>ACL</b>       | 0.56            | 0.12                  | 4.69           | p<0.0001       |
| <b>OA</b>        | -0.15           | 0.14                  | -1.07          | p=0.288        |

SFP = suprapatellar fat pad; BMI = body mass index; ACL = anterior cruciate ligament; OA = Osteoarthritis.

\* the variable did not follow a normal distribution, thus the logarithm of the variable was analyzed.

**Table S8. Multivariate analysis of SFP surface\*.**

|                  | <b>Estimate</b> | <b>Standard error</b> | <b>t-value</b> | <b>p-value</b> |
|------------------|-----------------|-----------------------|----------------|----------------|
| <b>Intercept</b> | 6.23            | 0.26                  | 23.82          | p<0.0001       |
| <b>Age</b>       | 0.003           | 0.003                 | 1.10           | p=0.279        |
| <b>Sex</b>       | -0.18           | 0.07                  | -2.40          | p=0.019        |
| <b>BMI</b>       | 0.02            | 0.01                  | 2.14           | p=0.035        |
| <b>ACL</b>       | 0.33            | 0.09                  | 3.64           | p<0.001        |
| <b>OA</b>        | -0.14           | 0.11                  | -1.30          | p=0.196        |

SFP = suprapatellar fat pad; BMI = body mass index; ACL = anterior cruciate ligament; OA = Osteoarthritis.

\* the variable did not follow a normal distribution, thus the logarithm of the variable was analyzed.

**Table S9. Multivariate analysis of IFP hypointense signal.**

|            | <b>Estimate</b> | <b>Standard error</b> | <b>z-value</b> | <b>p-value</b> |
|------------|-----------------|-----------------------|----------------|----------------|
| <b>0 1</b> | 1.184           | 1.682                 | 0.704          | 0.481          |
| <b>1 2</b> | 3.122           | 1.719                 | 1.816          | 0.069          |
| <b>2 3</b> | 4.845           | 1.763                 | 2.748          | 0.006          |
| <b>Age</b> | 0.009           | 0.020                 | 0.44           | p=0.662        |
| <b>Sex</b> | -1.35           | 0.53                  | -2.54          | p=0.011        |
| <b>BMI</b> | 0.03            | 0.05                  | 0.54           | p=0.590        |
| <b>ACL</b> | 0.72            | 0.58                  | 1.21           | p=0.225        |
| <b>OA</b>  | 3.71            | 0.78                  | 4.72           | p<0.0001       |

IFP = infrapatellar fat pad; BMI = body mass index; ACL = anterior cruciate ligament; OA = Osteoarthritis.

**Table S10. Multivariate analysis of SFP hypointense signal.**

|            | <b>Estimate</b> | <b>Standard error</b> | <b>z-value</b> | <b>p-value</b> |
|------------|-----------------|-----------------------|----------------|----------------|
| <b>0 1</b> | -2.602          | 1.585                 | 0.704          | 0.101          |
| <b>1 2</b> | -0.621          | 1.557                 | 1.816          | 0.690          |
| <b>Age</b> | -0.019          | 0.019                 | -0.996         | p=0.319        |
| <b>Sex</b> | -0.24           | 0.47                  | -0.51          | p=0.609        |
| <b>BMI</b> | -0.01           | 0.05                  | -0.21          | p=0.832        |
| <b>ACL</b> | -1.83           | 0.58                  | -3.12          | p=0.002        |
| <b>OA</b>  | 0.36            | 0.69                  | 0.53           | p=0.598        |

SFP = suprapatellar fat pad; BMI = body mass index; ACL = anterior cruciate ligament; OA = Osteoarthritis.

**Table S11. Multivariate analysis of PL depth.**

|                  | Estimate | Standard error | t-value | p-value  |
|------------------|----------|----------------|---------|----------|
| <b>Intercept</b> | 5.33     | 0.49           | 10.87   | p<0.0001 |
| <b>Age</b>       | -0.019   | 0.006          | -1.76   | p=0.082  |
| <b>Sex</b>       | -0.50    | 0.15           | -3.43   | p<0.001  |
| <b>BMI</b>       | -0.02    | 0.01           | -1.21   | p=0.229  |
| <b>ACL</b>       | -0.26    | 0.18           | -1.50   | p=0.137  |
| <b>OA</b>        | 0.09     | 0.21           | 0.44    | p=0.659  |

PL = patellar ligament; BMI = body mass index; ACL = anterior cruciate ligament; OA = Osteoarthritis.
